# Supplementary material for: Expression profiling of N6-methyladenosine-modified mRNA in PC12 cells in response to unconjugated bilirubin
Source: PubMed Central journal article supplement (PMC10374823; doi:10.1007/s11033-023-08576-1), 2023-06-28

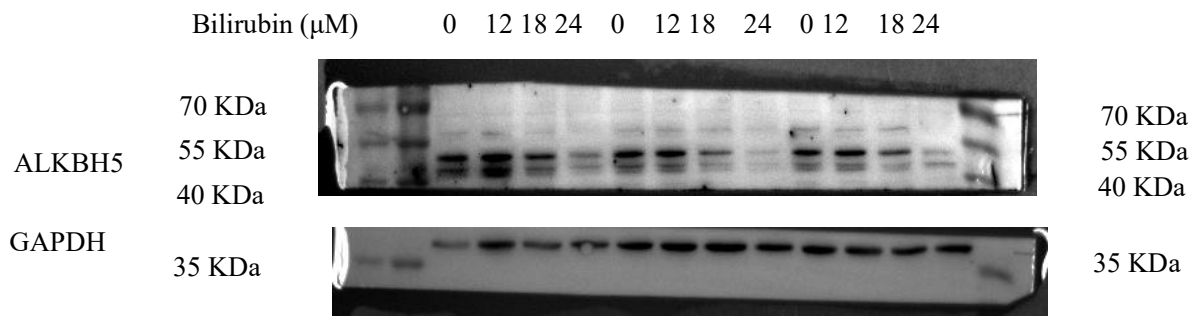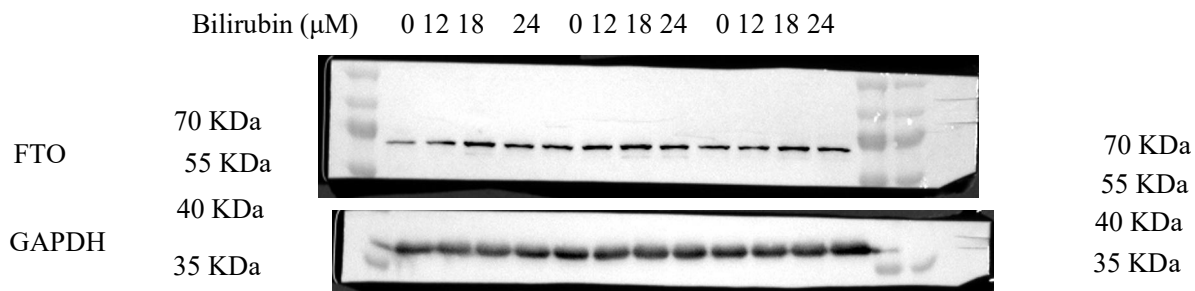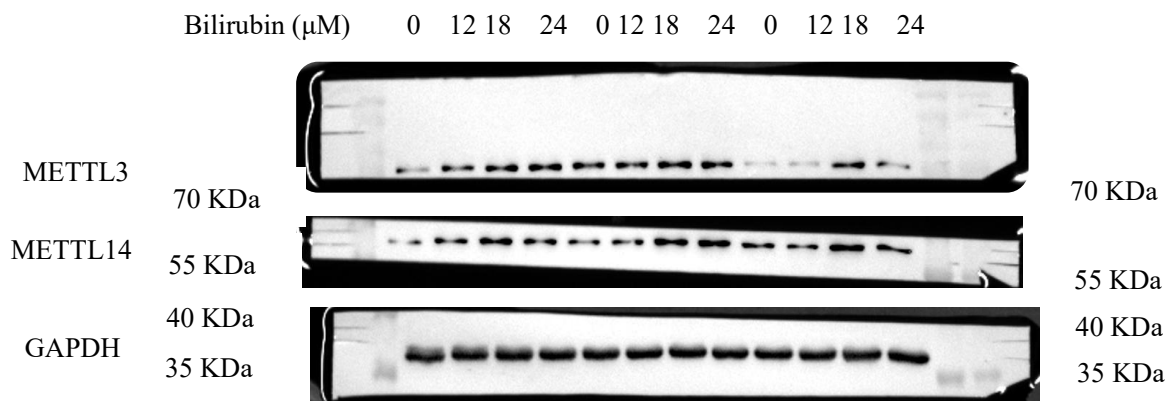

Supplement: 11033_2023_8576_MOESM1_ESM.pdf [file 11033_2023_8576_MOESM1_ESM.pdf]
